# Supplementary material for: The critical effect of solvent geometry on the determination of fullerene (C60) self-assembly into dot, wire and disk structures
Source: Royal Society of Chemistry journal article supplement (doi:10.1039/b909888g), 2009-01-01
Supplement: b909888g.pdf [file b909888g.pdf]

## Electronic Supplementary Information

### The critical effect of solvent geometry on the determination of fullerene (C<sub>60</sub>) self-assembly into dot, wire, and disk structures

Chibeom Park, Hyun Jae Song and Hee Cheul Choi\*

*Department of Chemistry and Division of Advanced Materials Science, Pohang  
University of Science and Technology, San 31, Hyoja-Dong, Nam-Gu, Pohang, Korea  
790-784*

#### Powder X-ray diffraction

XRD spectra for the C<sub>60</sub> wires and hexagonal disks were obtained using a synchrotron X-ray diffractometer (Pohang Accelerator Laboratory, 8C2 beamline) with 9 keV radiation corresponding to 1.3776 Å wavelength. The obtained data was converted to CuKα (λ=1.5405 Å) radiation scale for the convenience to compare with previously reported data.

#### Scanning & transmission electron microscopy

FE-SEM (JEOL JSM-7401F, 15 kV) was used for obtaining SEM images, and high resolution-TEM (HRTEM, JEOL JSM-6700F) was used for electron diffraction pattern analyses.

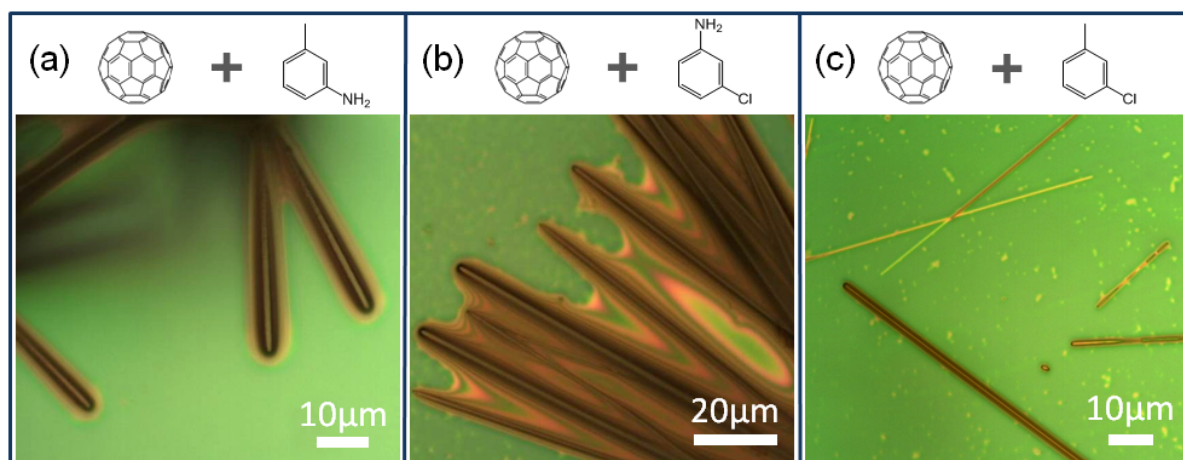

**Fig. S1** Optical microscope images of C<sub>60</sub> wires obtained from C<sub>60</sub> solutions of (a) m-toluidine, (b) 3-chloroaniline and (c) 3-chlorotoluene

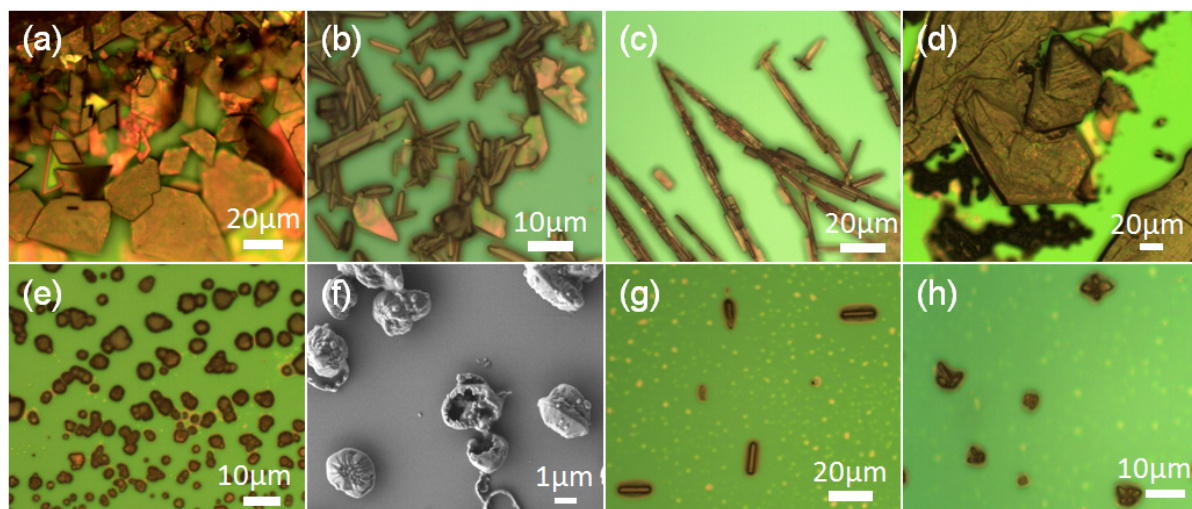

**Fig. S2** Optical and SEM images of shapeless C<sub>60</sub> crystals obtained from C<sub>60</sub> solutions of (a) benzene, (b) chlorobenzene, (c) toluene, (d) o-xylene (e) p-xylene (f) 1,2,4-trimethylbenzene, (g) dichloromethane and (h) chloroform
